# Supplementary material for: Genome-Wide Association Study Uncover the Genetic Architecture of Salt Tolerance-Related Traits in Common Wheat (Triticum aestivum L.)
Source: Front Genet. 2021 May 20;12:663941. doi: 10.3389/fgene.2021.663941 (PMC8172982; doi:10.3389/fgene.2021.663941)
Supplement: Supplementary Table 2 — Basic statistical analysis of SNP markers used for genome-wide association study (GWAS) of 317 wheat accessions. [file Table_2.XLSX]

## Sheet: Sheet1
Table S2 Basic statistical analysis of SNP markers used for genome-wide association study (GWAS) of 317 wheat accessions
Chr a	No. of markers	Length (Mb）	Density (Mb/marker)
1A	2640	594	0.225
1B	3160	689.4	0.218165
1D	2284	495.4	0.2169
2A	3100	780.7	0.251839
2B	4432	801.2	0.180776
2D	2703	651.6	0.241065
3A	2537	750.8	0.29594
3B	2912	830.3	0.28513
3D	1922	615.4	0.320187
4A	2262	744.5	0.329134
4B	2052	673.4	0.328168
4D	1383	509.6	0.368474
5A	2699	709.7	0.262949
5B	3344	713	0.213218
5D	2226	566	0.254268
6A	2449	618	0.252348
6B	2639	720.9	0.273172
6D	1709	473.5	0.277063
7A	2936	736.6	0.250886
7B	2552	750.6	0.294122
7D	2180	638.6	0.292936
A genome	18623	4934.5	0.264968
B genome	21091	5179	0.245555
D genome	14407	3950.4	0.2742
